# ABCA1 mutation carriers with low high-density lipoprotein cholesterol are characterized by a larger atherosclerotic burden

Andrea E. Bochem<sup>1</sup>, Diederik F. van Wijk<sup>1</sup>, Adriaan G. Holleboom<sup>1</sup>, Raphaël Duivenvoorden<sup>1</sup>, Mahdi M. Motazacker<sup>2</sup>, Geesje M. Dallinga-Thie<sup>2</sup>, Eric de Groot<sup>1</sup>, John J.P. Kastelein<sup>1</sup>, Aart J. Nederveen<sup>3</sup>, G. Kees Hovingh<sup>1</sup>, and Erik S.G. Stroes<sup>1\*</sup>

<sup>1</sup>Department of Vascular Medicine, Academic Medical Center, Meibergdreef 9, 1105 AZ, Amsterdam, The Netherlands; <sup>2</sup>Department of Experimental Vascular Medicine, Academic Medical Center, Amsterdam, The Netherlands; and <sup>3</sup>Department of Radiology, Academic Medical Center, Amsterdam, The Netherlands

Received 13 June 2012; revised 22 August 2012; accepted 15 October 2012; online publish-ahead-of-print 7 November 2012

## Aims

Low HDL-C is a potent risk factor for cardiovascular disease (CVD). Yet, mutations in ABCA1, a major determinant of circulating HDL-C levels, were previously not associated with CVD risk in cohort studies. To study the consequences of low plasma levels of high-density lipoprotein cholesterol (HDL-C) due to ATP-binding cassette transporter A1 (ABCA1) dysfunction for atherosclerotic vascular disease in the carotid arteries.

## Methods and results

We performed 3.0 Tesla magnetic resonance imaging (MRI) measurements of the carotid arteries in 36 carriers of high impact functional ABCA1 mutations and 36 normolipidemic controls. Carriers presented with 42% lower HDL-C levels ( $P < 0.001$ ), a larger mean wall area ( $18.6 \pm 6.0$  vs.  $15.8 \pm 4.3$  mm<sup>2</sup>;  $P = 0.02$ ), a larger mean wall thickness ( $0.82 \pm 0.21$  vs.  $0.70 \pm 0.14$  mm;  $P = 0.005$ ), and a higher normalized wall index ( $0.37 \pm 0.06$  vs.  $0.33 \pm 0.04$ ;  $P = 0.005$ ) compared with controls, retaining significance after adjustment for smoking, alcohol consumption, systolic blood pressure, diabetes, body mass index, history of CVD, LDL-C, and statin use ( $P = 0.002$ ).

## Conclusion

Carriers of loss of function ABCA1 mutations display a larger atherosclerotic burden compared with age and sex-matched controls, implying a higher risk for CVD. Further studies are needed to elucidate the full function of ABCA1 in the protection against atherosclerosis. These data support the development of strategies to up-regulate ABCA1 in patients with established CVD.

## Keywords

HDL • ABCA1 • Carotid MRI • Lipoproteins • Atherosclerosis

## Introduction

Prospective studies have consistently shown that high-density lipoprotein cholesterol (HDL-C) is inversely correlated with cardiovascular risk.<sup>1–3</sup> As a consequence, HDL-increasing strategies have been studied intensively to reduce the residual cardiovascular risk in statin-treated patients.<sup>4–6</sup> The lack of specific and potent HDL-increasing compounds, however, has precluded us from answering the question whether HDL-C is a truly causal factor in atherogenesis.<sup>7</sup> In fact, Briel et al.<sup>8</sup> reported the absence of a

correlation between HDL-C increase and CVD risk in a recent meta-analysis comprising data from ~300 000 subjects having received lipid-modulating therapies, whereas low-density lipoprotein cholesterol (LDL-C) decrease was invariably associated with a decrease in cardiovascular risk. None of these lipid-modulating therapies, however, had as its primary objective to raise HDL-C. The absolute increases in circulating HDL-C levels in these studies were modest, raising the possibility of a power problem of the analyses. Moreover, the lack of effect of CETP inhibition,<sup>6,9</sup> and nicotinic acid has increased the concerns regarding HDL-C as

\* Corresponding author. Tel: +31 205666612, Fax: +31 205669343, Email: e.s.stroes@amc.uva.nl

Published on behalf of the European Society of Cardiology. All rights reserved. © The Author 2012. For permissions please email: journals.permissions@oup.com

a suitable target for the prevention of CVD, although these trials were troubled by either off-target effects<sup>10,11</sup> or design issues.<sup>12</sup> Combined with the fact that HDL-C levels are confounded by other risk factors, such as body mass index (BMI), triglycerides (TG), and smoking;<sup>13,14</sup> this has cast doubt on the causal role of the HDL particle in atherogenesis.

The most widely characterized mechanism by which HDL-C protects against atherosclerosis is reverse cholesterol transport.<sup>15</sup> In this pathway, pivotal steps comprise the ABCA1 (adenosine triphosphate-binding cassette transporter A1)-mediated cholesterol efflux (GenBank No. AF275948) followed by esterification of cholesterol via lecithin-cholesterol acyltransferase (LCAT).<sup>16,17</sup> Heterozygous ABCA1 mutation carriers are characterized by half-normal HDL-C levels. Schaefer *et al.*<sup>18</sup> reported that 19% of ABCA1 heterozygotes and 45% of ABCA1 homozygotes had evidence of coronary artery or cerebrovascular disease, compared with 4% in the control population. In line, van Dam *et al.*<sup>19</sup> reported the loss of efflux capacity in ABCA1 mutation carriers with a correspondingly increased carotid intima-media thickness (cIMT). In contrast, Frikke-Schmidt *et al.*<sup>20</sup> reported that in 109 ABCA1 mutation carriers compared with 41 852 controls, the multifactorially adjusted OR for ischaemic heart disease was 0.93 (59% CI: 0.53–1.62) for heterozygous ABCA1 mutation carriers compared with controls.

We, therefore, decided to assess the effects of loss of function ABCA1 mutations on atherosclerosis. We performed carotid 3.0 Tesla magnetic resonance imaging (MRI) as well as cIMT imaging in ABCA1 mutation carriers and controls. Functionality of each ABCA1 mutation was verified using *in vitro* cholesterol efflux assays.

## Methods

### Study design

Subjects with low HDL-C levels, defined as HDL-C <5th percentile, were selected from a cohort of hypoalphalipoproteinaemia patients<sup>21</sup> and screened for ABCA1 mutations. Family members of ABCA1 mutation carriers were actively recruited. Carriers of functional ABCA1 gene mutations ( $n = 36$ ) and controls ( $n = 36$ ) matched for age and gender were enrolled in this study. Index patients were excluded if CVD was present at the time of referral. Furthermore, blood was obtained from 36 unaffected family members for lipid analysis. All participants provided written informed consent. The study was conducted at the Academic Medical Center in Amsterdam, the Netherlands from March 2010 to November 2011. The study protocol was approved by the Institutional Review Board.

The presence of cardiovascular risk factors, the use of medication, and a family history of CVD were assessed by a questionnaire. Blood pressures were measured using an oscillometric blood pressure device (Omron 705IT, Hoofddorp, the Netherlands). The BMI was calculated from weight and length. The HOMA index was calculated as  $(\text{glucose} \times \text{insulin})/22.5$ . Blood was obtained after an overnight fast and stored at  $-80^{\circ}\text{C}$ . Plasma cholesterol, LDL-C, HDL-C, and TG were analysed using commercially available kits (Randox, Antrim, UK and Wako, Neuss, Germany). Plasma apolipoprotein AI and apolipoprotein B were measured using a commercially available turbidometric assay (Randox, Antrim, UK). All analyses were performed using the Cobas Mira autoanalyzer (Roche, Basel, Switzerland).

### Genotyping

Mutation detection was performed as published previously.<sup>21</sup> In short, the sequence reactions were performed using a BigDye terminator ABI prism kit (Applied Biosystems, Foster City, CA, USA). Sequences were analysed with the Sequencher package (Gene Codes Co, Ann Arbor, MI, USA).

### Cholesterol efflux assays

ABCA1 mutation functionality was tested using skin fibroblasts (passage number 5–15), cultured in 24-well plates until 80% confluency. The cells were loaded with media containing 0.2% BSA, 30  $\mu\text{g}/\text{mL}$  cholesterol, and 0.5  $\mu\text{Ci}/\text{mL}$   $^3\text{H}$ -cholesterol for 24 h. After washing, the cholesterol efflux was started by the addition of 10  $\mu\text{g}/\text{mL}$  apoA-I. After 4 h, the medium was collected and the amount of  $^3\text{H}$ -cholesterol was quantified by liquid scintillation counting. Cellular concentrations of  $^3\text{H}$ -cholesterol were measured after extraction of the cells with 2-propanol. The percentage efflux was calculated by dividing the counts in the efflux medium by the sum of the counts in the medium plus the cell extract.

### Carotid magnetic resonance imaging

Scans were performed as described previously.<sup>22</sup> In short, scans were obtained in a 3.0 Tesla Philips whole-body scanner (Philips, Best, the Netherlands), using a single-element microcoil (Philips, Hamburg, Germany). Ten slices were scanned of the distal 3.0 cm of the left and right common carotid artery. A total of 20 images were obtained per scan. Images were saved in DICOM format using standardized protocols.<sup>22,23</sup>

Quantitative image analysis was performed using the semi-automated measurement software (VesselMass, Leiden University Medical Center, the Netherlands).<sup>24</sup> One trained reader, with excellent scan-rescan and intra-observer variability analysed all the images using standardized protocols for reading and rating images combined with dedicated semi-automated software,<sup>22,23</sup> blinded for all data of the participants. The mean wall thickness (MWT), lumen area (LA), outer wall area (OWA), and total wall volume (TWV) were measured. The normalized wall index (NWI) was calculated as:  $\text{NWI} = \text{MWA}/\text{OWA}$ . The mean wall area (MWA) is calculated as:  $\text{MWA} = \text{meanOWA} - \text{meanLA}$ . The prevalence of plaque components (PC) and the total PC volume ( $\text{mm}^3$ ) were also assessed. Plaque component was defined as an area with lower signal intensity within the arterial wall on a T1-weighted image, representing either lipid-rich tissue or calcification.<sup>25</sup> The prevalence of PC was reported as the percentage of the total number of images that showed PC. The volume of PC's was reported as the sum of all PC volumes of all subjects per group. A total of 46 slides, corresponding to 3% of the total, were excluded from the PC analysis due to insufficient quality.

### Carotid ultrasound imaging

Carotid B-mode ultrasound scans of the left and right common, bulb, and internal carotid arterial far walls were assessed as previously published.<sup>26</sup> One reader analysed all the images, blinded for group and any other data of the participants. The ultrasound parameter was the mean common carotid intima-media thickness (CclMT), defined as the average far wall IMT of the left and right distal 1 cm of the common carotid artery.

### Outcome parameters

The NWI was the primary outcome parameter of the study. Secondary MRI outcome parameters were MWA ( $\text{mm}^2$ ), MWT (mm), and TWV ( $\text{mm}^3$ ). The secondary ultrasound parameter was CclMT (mm). Plaque

component analysis, expressed as PC prevalence and total PC volume ( $\text{mm}^3$ ), was an exploratory endpoint.

## Statistical analysis

Continuous variables are expressed as means  $\pm$  standard deviations, unless otherwise specified. Possible differences in demographic, biometrical, and biochemical parameters between carriers of *ABCA1* mutations and controls were assessed using unpaired Student's *t*-tests,  $\chi^2$  tests, or Mann–Whitney *U* test, where appropriate. Differences in carotid imaging parameters between *ABCA1* mutation carriers and controls were assessed using unpaired Student's *t*-tests, unless otherwise specified. In addition, a linear regression model was used, in which carriership, smoking, alcohol consumption, systolic blood pressure, diabetes, BMI, history of cardiovascular disease (CVD), LDL-C, and statin use were indicated as independent variables and NWI, MWA, MWT, TWV, and CcIMT were indicated as dependent variables. The authors had full access to the raw data and take responsibility for its integrity.

## Results

### Baseline characteristics

*ABCA1* mutation carriers from 14 separate families were included, comprising 2 homozygous, 2 compound heterozygous, and 32 heterozygous patients. Subjects were carriers of the following mutations: c.6401+2T>C, p.Ser930Phe, p.Ser824Leu, p.Arg587Trp, p.Thr929Ile, p.Asn935Ser, c.3535+1G>C, p.Asp571Gly, p.Asn1800his, p.Leu1056Pro, p.Gln1038Ter, c.1195-1G>C, p.Arg579Gln, and p.Phe1760Valfs\*21. Controls from the general population were matched for age and gender (Table 1). Carriers displayed a 16% lower total cholesterol ( $P = 0.004$ ; Table 1), largely due to a 42% reduction in HDL-C levels ( $P < 0.001$ ). Apo B levels were higher by 10% in carriers ( $P = 0.19$ ), while carriers had 32% lower apo A-I levels ( $P < 0.001$ ; Table 1). Other parameters were not significantly different (Table 1).

Lipid profiles were measured in 36 unaffected family members of *ABCA1* mutation carriers, matched for age and gender. Total cholesterol ( $4.35 \pm 1.31$  vs.  $5.23 \pm 1.10$  mmol/L,  $P = 0.003$ ) and HDL-C ( $0.84 \pm 0.38$  vs.  $1.57 \pm 0.41$  mmol/L,  $P < 0.001$ ) were lower in carriers compared with unaffected relatives, whereas LDL-C was comparable ( $3.11 \pm 1.04$  vs.  $3.23 \pm 0.92$  mmol/L,  $P = 0.60$ ). Triglycerides were higher in carriers compared with unaffected relatives [ $1.06$  (0.78–1.39) vs.  $0.77$  (0.57–1.06) mmol/L,  $P = 0.002$ ].

### Cholesterol efflux assays

Fourteen mutations were found in the carriers. Five of these mutations have already been shown to have a significant impact on *ABCA1* function (p.Asn1800his,<sup>27</sup> p.Thr929Ile,<sup>27</sup> p.Arg587Trp,<sup>28,29</sup> p.Leu1056Pro,<sup>21</sup> and p.Phe1760Valfs\*21.<sup>30</sup>). The efflux capacity of the remaining nine mutations: p.Asn935Ser, c.3535+1G>C, p.Ser824Leu, p.Ser930Phe, p.Gln1038Ter, c.1195-1G>C, c.6401+2T>C, p.Asp571Gly, and p.Arg579Gln are listed in Figure 1. The cholesterol efflux capacity was assessed in heterozygotes, except for mutation p.Gln1038Ter which was tested in homozygous patient. Efflux

measured in fibroblasts from a heterozygous p.Cys1477Arg carrier was used as a positive control since the efflux capacity has consistently been shown to be impaired.<sup>19,27</sup> One patient compound heterozygous for mutation p.Arg579Gln and p.Val771Met was included. In the view of contradictory statements on functionality of mutation p.Val771Met,<sup>31</sup> we assumed that the major part of the efflux impairment of the p.Arg579Gln and p.Val771Met combination is attributable to p.Arg579Gln.

## Carotid magnetic resonance imaging and ultrasound

Magnetic resonance imaging data are shown in Table 2. The NWI was significantly higher in carriers compared with controls ( $P = 0.005$ ) (Figure 2). Adjustment for differences in smoking, alcohol consumption, systolic blood pressure, diabetes, BMI, history of CVD, LDL-C, and statin use resulted in an even stronger statistical significance ( $P = 0.002$ ). The mean wall area, MWT, and TWV were also significantly higher in carriers compared with controls ( $P = 0.02$ ,  $0.005$  and  $0.02$ , respectively) and retained significance after adjustment for the above mentioned risk factors ( $P = 0.03$ ,  $0.002$ , and  $0.03$ , respectively). Plaque components related to lipid-rich tissue or calcification (PC prevalence) were 2.5 times more prevalent in carriers compared with controls ( $P = 0.01$ , Figure 3) with a concomitant higher total PC volume (Table 2).

Ultrasound CcIMT was not higher in carriers compared with controls.

## Discussion

In the present study, we show that carriers of the loss of function *ABCA1* mutations exhibit more carotid artery wall thickening as assessed by MRI compared with age- and sex-matched controls. Both normalized wall index and MWA as well as thickness and TWV were significantly higher in carriers compared with controls. These differences retained significance after adjustment for traditional risk factors. In support, PCs were more prevalent in carriers compared with controls. Collectively, these findings support the concept that functional *ABCA1* mutations, resulting in lower cholesterol efflux capacity, lead to more atherosclerotic vascular disease.

Our results show a higher burden of carotid atherosclerosis in *ABCA1* mutation carriers. As expected, carriers presented with decreased cholesterol efflux capacity, which has been shown to be negatively correlated with an atherosclerotic burden.<sup>32</sup> Carriers also presented with more arterial wall thickening. Carotid artery wall thickening is associated with a higher risk of cardiovascular events.<sup>33,34</sup> In support, carriers were characterized by a higher prevalence of PCs. Recent data revealed that information on plaque composition in the carotid artery has a higher predictive value for CVD compared with a thickened cIMT per se.<sup>35</sup>

In contrast, cIMT assessed using ultrasound was not different between carriers and controls. This discrepancy between carotid MRI and carotid ultrasound measurements most likely reflects the lower sensitivity and higher variability of cIMT measurements when compared with carotid 3.0-T MRI.<sup>22</sup> We recently showed that heterozygous carriers of *LCAT* gene mutations also have

**Table 1** Characteristics in carriers of ATP-binding cassette transporter A1 gene mutations and controls

|                                      | ABCA1 mutation carriers (n = 36) | Controls (n = 36) | P-value |
|--------------------------------------|----------------------------------|-------------------|---------|
| <b>Characteristics</b>               |                                  |                   |         |
| Age (years)                          | 50.94 ± 15.56                    | 50.91 ± 11.30     | 1.00    |
| Male sex, n (%)                      | 18 (50)                          | 18 (50)           | 1.00    |
| Body mass index (kg/m <sup>2</sup> ) | 26.03 ± 4.29                     | 24.52 ± 3.04      | 0.90    |
| Smokers, n (%)                       | 13 (36)                          | 12 (33)           | 0.15    |
| Alcohol use (units per week)         | 6.31 ± 7.47                      | 10.00 ± 6.33      | 0.26    |
| <b>Medication use, n (%)</b>         |                                  |                   |         |
| Statin                               | 11 (28)                          | 4 (11)            | 0.04    |
| Ezetimibe                            | 4 (11)                           | 0 (0)             | 0.38    |
| Niacin                               | 2 (6)                            | 0 (0)             | 0.54    |
| Fibrate                              | 0 (0)                            | 0 (0)             | -       |
| Aspirin                              | 7 (19)                           | 0 (0)             | 0.22    |
| <b>Blood pressure</b>                |                                  |                   |         |
| Systolic (mmHg)                      | 139 (21)                         | 131 (13)          | 0.05    |
| Diastolic (mmHg)                     | 81 (10)                          | 80 (8)            | 0.84    |
| Hypertension, n (%)                  | 9 (25)                           | 7 (19)            | 0.57    |
| <b>Glucose metabolism</b>            |                                  |                   |         |
| Fasting glucose (mmol/L)             | 5.65 ± 1.52                      | 5.47 ± 0.77       | 0.55    |
| Fasting insulin (mU/L)               | 1.09 (1.09–6.01)                 | 3.48 (1.09–5.65)  | 0.67    |
| HOMA index                           | 0.34 (0.25–1.33)                 | 0.84 (0.26–1.36)  | 0.50    |
| Diabetes, n (%)                      | 3 (8)                            | 2 (6)             | 0.64    |
| <b>Lipid metabolism</b>              |                                  |                   |         |
| Total cholesterol (mmol/L)           | 4.35 ± 1.31                      | 5.20 ± 1.09       | 0.004   |
| LDL-cholesterol (mmol/L)             | 3.11 ± 1.04                      | 3.41 ± 0.83       | 0.18    |
| HDL-cholesterol (mmol/L)             | 0.84 ± 0.39                      | 1.44 ± 0.44       | <0.001  |
| Triglycerides (mmol/L)               | 1.06 (0.78–1.39)                 | 1.01 (0.68–1.40)  | 0.37    |
| Apolipoprotein B (mg/dL)             | 120.79 ± 41.10                   | 109.19 ± 26.64    | 0.19    |
| Apolipoprotein A-I (mg/dL)           | 106.21 ± 43.15                   | 156.74 ± 25.68    | <0.001  |

Values are indicated as mean ± SD unless otherwise indicated. Male sex, smokers, medication use, hypertension, diabetes: *P* for  $\chi^2$  test; for other parameters: *P* for Student's *t*-test. For the HOMA index, fasting insulin and triglycerides, we report median and inter-quartile range; *P*-value for Mann–Whitney *U* test. The HOMA index is the Homeostatic Model Assessment index, hypertension was defined as systolic blood pressure >140 mmHg, diastolic blood pressure >90 mmHg or use of antihypertensive medication.

more carotid atherosclerosis using MRI, whereas cIMT did not reveal any difference.<sup>36</sup> It should be noted that carotid ultrasound measures the wall thickness in a two-dimensional way, whereas atherosclerosis is a three-dimensional disease. Consequently, carotid MRI has been shown to yield superior power compared with ultrasound measurements, enabling smaller sample sizes to detect differences in the wall thickness.<sup>22</sup>

The absence of an IMT difference contradicts earlier findings by van Dam *et al.*<sup>19</sup> In their control group, IMTs were lower compared with our controls (0.63 vs. 0.69 mm), whereas the IMTs in their ABCA1 mutation carriers were higher compared with our ABCA1 mutation carrier group (0.73 vs. 0.67 mm).<sup>19</sup> Yet, there are clear differences between these papers. Methodologically, van Dam used a composite IMT endpoint including carotid and femoral arteries, whereas we used the reproducible thickness measurement of the far wall of the common carotid artery only. In addition, the mean age was ~13 years lower in their control

group compared with our controls. Taking into account an IMT progression of 0.0047 mm/year,<sup>19</sup> the calculated IMT of their controls at the age of 51 (0.69 mm) approximates the value observed in our control group (0.67 mm). With respect to the lower mean IMT in our ABCA1 mutation carriers (0.67 vs. 0.73), one-third (*n* = 11) of our carriers used statins when compared with the absence of statin use in the carriers reported by van Dam *et al.*,<sup>19</sup> whereas statins are known to reduce IMT progression by 0.02 mm within the first 6–12 months<sup>37</sup> followed by a decreased IMT progression at a longer follow-up.<sup>38</sup>

Genome-wide association studies revealed that ABCA1 correlates with HDL-C and total cholesterol,<sup>39,40</sup> but not with incidence of CVD.<sup>41</sup> A potential pitfall of GWAS studies, however, pertains to the fact that the effect of single nucleotide polymorphisms (SNPs) in a single gene on HDL-C levels is often small. This may result in an underestimation of the association between gene defects and CHD risk. Moreover, HDL is most strongly associated

with CHD risk in the case of low HDL-C levels. In GWAS studies, the extreme tails of HDL-C levels are typically under-represented. In most cases, SNPs result in small changes in HDL-C levels within the normal range. Consequently, no effect of the SNP on CHD risk is observed. Moreover, it is often unknown whether SNPs give rise to biologically relevant changes in ABCA1 function. As a consequence, findings from GWAS studies regarding the effect of ABCA1 on CVD risk have, only limited value, and cannot provide definite conclusions regarding gene function and associated CVD risk.

An alternative approach is the assessment of effects of genetic variation in ABCA1 using a Mendelian randomization approach as performed by Frikke-Schmidt *et al.*<sup>42</sup> In line with our results, they report that in a prospective cohort comprising ~9000

individuals, heterozygosity for the ABCA1 mutation p.Lys776Asn led to a two-to-three-fold higher risk of ischaemic heart disease. They also reported that three genetic variations in ABCA1 predict risk of ischaemic heart disease.<sup>31</sup> In a more recent prospective cohort study, they reported that heterozygosity for loss-of-function mutations was not associated with a higher risk of ischaemic heart disease.<sup>20</sup> Several factors may have contributed to the contrasting findings when comparing their results to our data. First, the discrepancy may relate to methodological differences. Frikke-Schmidt *et al.*<sup>43</sup> assessed functionality of the mutations using cholesterol efflux assays in transfected HeLa cells, mimicking homozygosity for the ABCA1 mutation. An efflux capacity of 79% was considered indicative of compromised efflux capacity, whereas in the case of homozygosity, the efflux is expected

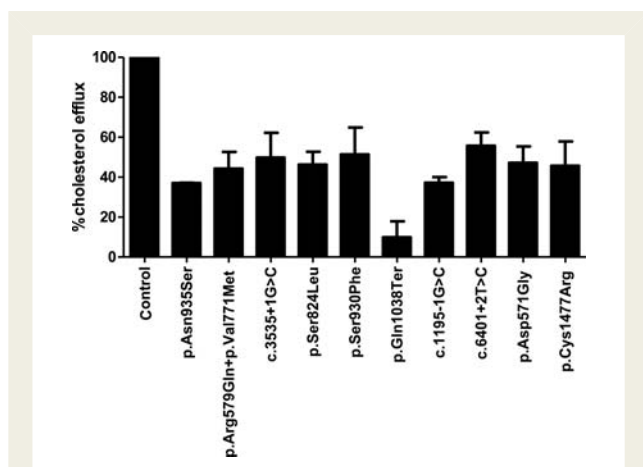

**Figure 1** Normalized cholesterol efflux from cultured skin fibroblasts to apoA-I. % Efflux is shown as mean  $\pm$  SD,  $n = 3$  separate experiments. Fibroblasts from a healthy control were used as a control.

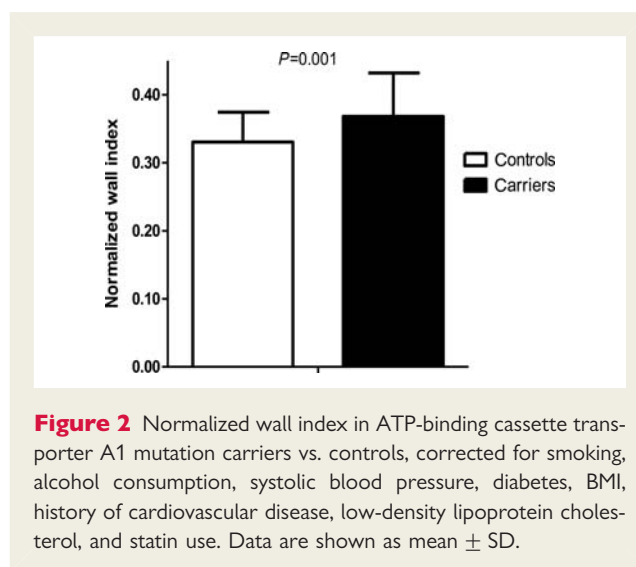

**Figure 2** Normalized wall index in ATP-binding cassette transporter A1 mutation carriers vs. controls, corrected for smoking, alcohol consumption, systolic blood pressure, diabetes, BMI, history of cardiovascular disease, low-density lipoprotein cholesterol, and statin use. Data are shown as mean  $\pm$  SD.

**Table 2** Carotid 3.0 Tesla magnetic resonance imaging and B-mode ultrasound parameters for ATP-binding cassette transporter A1 mutation carriers and controls

|                                   | ABCA1 mutation carriers ( $n = 36$ ) | Controls ( $n = 36$ ) | $P^1$ | Adjusted ( $P^2$ ) |
|-----------------------------------|--------------------------------------|-----------------------|-------|--------------------|
| 3.0 Tesla MRI                     |                                      |                       |       |                    |
| NWI                               | 0.37 (0.06)                          | 0.33 (0.04)           | 0.005 | 0.002              |
| MWA ( $\text{mm}^2$ )             | 18.6 (6.0)                           | 15.8 (4.3)            | 0.02  | 0.03               |
| MWT (mm)                          | 0.82 (0.21)                          | 0.70 (0.14)           | 0.005 | 0.002              |
| TWV ( $\text{mm}^3$ )             | 1116 (363)                           | 946 (255)             | 0.02  | 0.03               |
| Plaque composition analysis       |                                      |                       |       |                    |
| PC presence (%)                   | 32/670 (5)                           | 16/716 (2)            | 0.01  |                    |
| Total PC volume ( $\text{mm}^3$ ) | 230.8                                | 74.4                  |       |                    |
| B-Mode ultrasound                 |                                      |                       |       |                    |
| CcIMT (mm)                        | 0.67 (0.22)                          | 0.67 (0.16)           | 0.98  | 0.50               |

$P^1$  for the unadjusted model,  $P^2$  for multivariate model adjusting for smoking, alcohol consumption, systolic blood pressure, diabetes, BMI, history of cardiovascular disease (CVD), LDL-C, and statin use. CcIMT is the mean common carotid intima-media thickness. PC presence is reported as total number of images showing PC. Total PC volume is the sum of all PC volumes of all subjects per group. ABCA1, ATP-binding cassette transporter; NWI, normalized wall index; MWA, mean wall area; TWV, total wall volume; MWT, mean wall thickness; LA, lumen area; PC, plaque component.



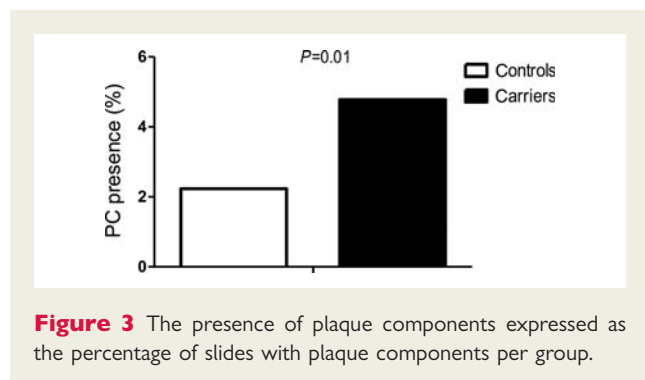

**Figure 3** The presence of plaque components expressed as the percentage of slides with plaque components per group.

to be 20–30%. This may have led to an inclusion of non-pathogenic mutations. In contrast, the efflux assays in our study were performed using patients' fibroblasts, representing the actual biology of a heterozygous ABCA1-deficient cell. Since variability of the assay is considerable, we performed the experiments in triplicate. The inclusion of relatively mild mutations in the prospective cohort study of Frikke-Schmidt is further reflected by the fact that the HDL-C levels in carriers compared with controls is only 29% lower. HDL-C levels in the present study were 42% lower, which is in line with the earlier reported HDL-C levels in heterozygous ABCA1 mutation carriers.<sup>44</sup>

## Limitations

Several aspects of our study deserve closer attention. First, we assessed a surrogate endpoint for CVD, which precludes us from drawing final conclusions with regard to cardiovascular event risk. The low incidence of mutation carriers makes it impossible to perform prospective outcome studies in ABCA1 heterozygotes. In spite of the relatively low number of subjects, the present study does provide evidence of an adverse effect of ABCA1 dysfunction on the arterial wall. Secondly, we cannot exclude the potential impact of indirect referral bias. Although we excluded all index cases referred for CVD from the analysis, a positive family history for CVD is a strong predictor for CVD.<sup>45</sup> Hence, we cannot exclude that family members of affected probands are characterized by thicker carotid artery walls due to factors beyond their ABCA1 mutation carriership.

## Clinical implications

The present study shows that carriers of ABCA1 mutations display more carotid atherosclerosis compared with controls implying a higher CVD risk. These findings suggest that early and aggressive CVD preventive measures are warranted in ABCA1 mutation carriers. Collectively, our findings lend support to the concept that up-regulation of ABCA1 is an attractive target for future CVD risk reduction.

## Acknowledgements

The authors would like to thank C.A.M. Koch and J.F. Los for their assistance in expanding the pedigrees, J. Peter for his role in identification of ABCA1 mutation carriers and A.W.M. Schimmel for her work on the cholesterol efflux experiments. The authors thank J.A. Kuivenhoven for his scientific advice and A.H. Zwiderman for his statistical advice.

## Funding

This work was supported by the Dutch Heart Foundation (grant number 2009B027) and by an educational grant by Merck Sharp Dohme (MSD, Haarlem, the Netherlands). Prof. Kastelein is a recipient of The Lifetime Achievement Award of The Dutch Heart Foundation (2011, the Hague, the Netherlands).

**Conflict of interest:** none declared.

## References

- Murray CJ, Lopez AD. Global mortality, disability, and the contribution of risk factors: Global Burden of Disease Study. *Lancet* 1997;**349**:1436–1442.
- Gordon DJ, Probstfield JL, Garrison RJ, Neaton JD, Castelli WP, Knoke JD, Jacobs DR Jr, Bangdiwala S, Tyroler HA. High-density lipoprotein cholesterol and cardiovascular disease. Four prospective American studies. *Circulation* 1989;**79**:8–15.
- Assmann G, Schulte H. Relation of high-density lipoprotein cholesterol and triglycerides to incidence of atherosclerotic coronary artery disease (the PROCAM experience). Prospective Cardiovascular Munster study. *Am J Cardiol* 1992;**70**:733–737.
- Wierzbicki AS, Mikhailidis DP, Wray R, Schacter M, Cramb R, Simpson WG, Byrne CB. Statin-fibrate combination: therapy for hyperlipidemia: a review. *Curr Med Res Opin* 2003;**19**:155–168.
- AIM-HIGH Investigators. Boden WE, Probstfield JL, Anderson T, Chaitman BR, Desvignes-Nickens P, Koprowicz K, McBride R, Teo K, Weintraub W. Niacin in patients with low HDL cholesterol levels receiving intensive statin therapy. *N Engl J Med* 2011;**365**:2255–2267.
- Barter PJ, Caulfield M, Eriksson M, Grundy SM, Kastelein JJ, Komajda M, Lopez-Sendon J, Mosca L, Tardif JC, Waters DD, Shear CL, Revkin JH, Buhr KA, Fisher MR, Tall AR, Brewer B. Effects of torcetrapib in patients at high risk for coronary events. *N Engl J Med* 2007;**357**:2109–2122.
- Vergeer M, Holleboom AG, Kastelein JJ, Kuivenhoven JA. The HDL hypothesis: does high-density lipoprotein protect from atherosclerosis? *J Lipid Res* 2010;**51**:2058–2073.
- Briel M, Ferreira-Gonzalez I, You JJ, Karanicolas PJ, Akl EA, Wu P, Blechacz B, Bassler D, Wei X, Sharman A, Whitt I, Alves da SS, Khalid Z, Nordmann AJ, Zhou Q, Walter SD, Vale N, Bhatnagar N, O'Regan C, Mills EJ, Bucher HC, Montori VM, Guyatt GH. Association between change in high density lipoprotein cholesterol and cardiovascular disease morbidity and mortality: systematic review and meta-regression analysis. *BMJ* 2009;**338**:b92.
- F.Hoffmann-La Roche Ltd. Media release: Roche provides update on Phase III study of dalcetrapib. 2012.
- Vergeer M, Stroes ES. The pharmacology and off-target effects of some cholesterol ester transfer protein inhibitors. *Am J Cardiol* 2009;**104**(10 Suppl):32E–38E.
- Stroes ES, Kastelein JJ, Benardeau A, Kuhlmann O, Blum D, Campos LA, Clerc RG, Niesor EJ. Dalcetrapib: no off-target toxicity on blood pressure or on genes related to the renin-angiotensin-aldosterone system in rats. *Br J Pharmacol* 2009;**158**:1763–1770.
- Bloomgarden Z, Handelsman Y. Did AIM-HIGH aim too low? *J Diabetes* 2012;**4**:1–2.
- van der Steeg WA, Boekholdt SM, Stein EA, El-Harchaoui K, Stroes ES, Sandhu MS, Wareham NJ, Jukema JW, Luben R, Zwiderman AH, Kastelein JJ, Khaw KT. Role of the apolipoprotein B-apolipoprotein A-I ratio in cardiovascular risk assessment: a case-control analysis in EPIC-Norfolk. *Ann Intern Med* 2007;**146**:640–648.
- Barter P, Gotto AM, LaRosa JC, Maroni J, Szarek M, Grundy SM, Kastelein JJ, Bittner V, Fruchart JC. HDL cholesterol, very low levels of LDL cholesterol, and cardiovascular events. *N Engl J Med* 2007;**357**:1301–1310.
- Wang X, Collins HL, Ranalletta M, Fuki IV, Billheimer JT, Rothblat GH, Tall AR, Rader DJ. Macrophage ABCA1 and ABCG1, but not SR-BI, promote macrophage reverse cholesterol transport in vivo. *J Clin Invest* 2007;**117**:2216–2224.
- Glomset JA. The plasma lecithins:cholesterol acyltransferase reaction. *J Lipid Res* 1968;**9**:155–167.
- Wang N, Silver DL, Costet P, Tall AR. Specific binding of ApoA-I, enhanced cholesterol efflux, and altered plasma membrane morphology in cells expressing ABCA1. *J Biol Chem* 2000;**275**:33053–33058.
- Schaefer EJ, Zech LA, Schwartz DE, Brewer HB Jr. Coronary heart disease prevalence and other clinical features in familial high-density lipoprotein deficiency (Tangier disease). *Ann Intern Med* 1980;**93**:261–266.
- van Dam MJ, de GE, Clee SM, Hovingh GK, Roelants R, Brooks-Wilson A, Zwiderman AH, Smit AJ, Smelt AH, Groen AK, Hayden MR, Kastelein JJ. Association between increased arterial-wall thickness and impairment in ABCA1-driven cholesterol efflux: an observational study. *Lancet* 2002;**359**:37–42.

20. Frikke-Schmidt R, Nordestgaard BG, Stene MC, Sethi AA, Remaley AT, Schnohr P, Tybjaerg-Hansen A. Association of loss-of-function mutations in the ABCA1 gene with high-density lipoprotein cholesterol levels and risk of ischemic heart disease. *JAMA* 2008;**299**:2524–2532.
21. Candini C, Schimmel AW, Peter J, Bochem AE, Holleboom AG, Vergeer M, Dullaart RP, Dallinga-Thie GM, Hovingh GK, Khoo KL, Fasano T, Bocchi L, Calandra S, Kuivenhoven JA, Motazacker MM. Identification and characterization of novel loss of function mutations in ATP-binding cassette transporter A1 in patients with low plasma high-density lipoprotein cholesterol. *Atherosclerosis* 2010;**213**:492–498.
22. Duivenvoorden R, de GE, Elsen BM, Lameris JS, van der Geest RJ, Stroes ES, Kastelein JJ, Nederveen AJ. In vivo quantification of carotid artery wall dimensions: 3.0-Tesla MRI versus B-mode ultrasound imaging. *Circ Cardiovasc Imaging* 2009;**2**:235–242.
23. Duivenvoorden R, de GE, Afzali H, Vanbavel ET, de Boer OJ, Lameris JS, Fayad ZA, Stroes ES, Kastelein JJ, Nederveen AJ. Comparison of *in vivo* carotid 3.0-T magnetic resonance to B-mode ultrasound imaging and histology in a porcine model. *JACC Cardiovasc Imaging* 2009;**2**:744–750.
24. Adame IM, de Koning PJ, Lelieveldt BP, Wasserman BA, Reiber JH, van der Geest RJ. An integrated automated analysis method for quantifying vessel stenosis and plaque burden from carotid MRI images: combined postprocessing of MRA and vessel wall MR. *Stroke* 2006;**37**:2162–2164.
25. Yuan C, Mitsumori LM, Beach KW, Maravilla KR. Carotid atherosclerotic plaque: noninvasive MR characterization and identification of vulnerable lesions. *Radiology* 2001;**221**:285–299.
26. de GE, Hovingh GK, Wiegman A, Duriez P, Smit AJ, Fruchart JC, Kastelein JJ. Measurement of arterial wall thickness as a surrogate marker for atherosclerosis. *Circulation* 2004;**109**:III33–III38.
27. Singaraja RR, Visscher H, James ER, Chroni A, Coutinho JM, Brunham LR, Kang MH, Zannis VI, Chimini G, Hayden MR. Specific mutations in ABCA1 have discrete effects on ABCA1 function and lipid phenotypes both *in vivo* and *in vitro*. *Circ Res* 2006;**99**:389–397.
28. Theaudin M, Couvert P, Fournier E, Boujeir E, Perrotte P, Vaschalde Y, Maissonobe T, Bonnefont-Rousselot D, Carrie A, Le FN. Lewis-Sumner syndrome and Tangier disease. *Arch Neurol* 2008;**65**:968–970.
29. Pisciotto L, Bocchi L, Candini C, Sallo R, Zanotti I, Fasano T, Chakrapani A, Bates T, Bonardi R, Cantafora A, Ball S, Watts G, Bernini F, Calandra S, Bertolini S. Severe HDL deficiency due to novel defects in the ABCA1 transporter. *J Intern Med* 2009;**265**:359–372.
30. Hovingh GK, Kuivenhoven JA, Bisoodial RJ, Groen AK, van DM, van TA, Wellington C, Hayden MR, Smelt AH, Kastelein JJ. HDL deficiency and atherosclerosis: lessons from Tangier disease. *J Intern Med* 2004;**255**:299–301.
31. Frikke-Schmidt R, Nordestgaard BG, Jensen GB, Steffensen R, Tybjaerg-Hansen A. Genetic variation in ABCA1 predicts ischemic heart disease in the general population. *Arterioscler Thromb Vasc Biol* 2008;**28**:180–186.
32. Khera AV, Cuchel M, Llera-Moya M, Rodrigues A, Burke MF, Jafri K, French BC, Phillips JA, Mucksavage ML, Wilensky RL, Mohler ER, Rothblat GH, Rader DJ. Cholesterol efflux capacity, high-density lipoprotein function, and atherosclerosis. *N Engl J Med* 2011;**364**:127–135.
33. Takaya N, Yuan C, Chu B, Moya M, Underhill H, Cai J, Tran N, Polissar NL, Isaac C, Ferguson MS, Garden GA, Cramer SC, Maravilla KR, Hashimoto B, Hatsukami TS. Association between carotid plaque characteristics and subsequent ischemic cerebrovascular events: a prospective assessment with MRI—initial results. *Stroke* 2006;**37**:818–823.
34. Oyama N, Gona P, Salton CJ, Chuang ML, Jhaveri RR, Blease SJ, Manning AR, Lahiri M, Botnar RM, Levy D, Larson MG, O'Donnell CJ, Manning WJ. Differential impact of age, sex, and hypertension on aortic atherosclerosis: the Framingham Heart Study. *Arterioscler Thromb Vasc Biol* 2008;**28**:155–159.
35. Nambi V, Chambless L, He M, Folsom AR, Mosley T, Boerwinkle E, Ballantyne CM. Common carotid artery intima-media thickness is as good as carotid intima-media thickness of all carotid artery segments in improving prediction of coronary heart disease risk in the Atherosclerosis Risk in Communities (ARIC) study. *Eur Heart J* 2012;**33**:183–190.
36. Duivenvoorden R, Holleboom AG, van den Bogaard B, Nederveen AJ, de GE, Hutten BA, Schimmel AW, Hovingh GK, Kastelein JJ, Kuivenhoven JA, Stroes ES. Cholesterol acyltransferase gene mutations have accelerated atherogenesis as assessed by carotid 3.0-T magnetic resonance imaging carriers of lecithin. *J Am Coll Cardiol* 2011;**58**:2481–2487.
37. Vergeer M, Zhou R, Bots ML, Duivenvoorden R, Koglin J, Akdim F, Mitchel YB, Huijgen R, Sapre A, de GE, Sijbrands EJ, Pasternak RC, Gagne C, Marais AD, Ballantyne CM, Isaacs JH, Stalenhoef AF, Kastelein JJ. Carotid atherosclerosis progression in familial hypercholesterolemia patients: a pooled analysis of the ASAP, ENHANCE, RADIANCE 1, and CAPTIVATE studies. *Circ Cardiovasc Imaging* 2010;**3**:398–404.
38. Smilde TJ, van WS, Wollersheim H, Trip MD, Kastelein JJ, Stalenhoef AF. Effect of aggressive versus conventional lipid lowering on atherosclerosis progression in familial hypercholesterolemia (ASAP): a prospective, randomised, double-blind trial. *Lancet* 2001;**357**:577–581.
39. Kathiresan S, Willer CJ, Peloso GM, Demissie S, Musunuru K, Schadt EE, Kaplan L, Bennett D, Li Y, Tanaka T, Voight BF, Bonnycastle LL, Jackson AU, Crawford G, Surti A, Guiducci C, Burt NP, Parish S, Clarke R, Zelenika D, Kubalanza KA, Morken MA, Scott LJ, Stringham HM, Galan P, Swift AJ, Kuusisto J, Bergman RN, Sundvall J, Laakso M, Ferrucci L, Scheet P, Sanna S, Uda M, Yang Q, Lunetta KL, Dupuis J, de Bakker PI, O'Donnell CJ, Chambers JC, Kooner JS, Hercberg S, Meneton P, Lakatta EG, Scuteri A, Schlessinger D, Tuomilehto J, Collins FS, Groop L, Altshuler D, Collins R, Lathrop GM, Melander O, Salomaa V, Peltonen L, Orho-Melander M, Ordovas JM, Boehnke M, Abecasis GR, Mohlke KL, Cupples LA. Common variants at 30 loci contribute to polygenic dyslipidemia. *Nat Genet* 2009;**41**:56–65.
40. Teslovich TM, Musunuru K, Smith AV, Edmondson AC, Stylianou IM, Koseki M, Pirruccello JP, Ripatti S, Chasman DI, Willer CJ, Johansen CT, Fouchier SW, Isaacs A, Peloso GM, Barbalic M, Ricketts SL, Bis JC, Aulchenko YS, Thorleifsson G, Feitosa MF, Chambers J, Orho-Melander M, Melander O, Johnson T, Li X, Guo X, Li M, Shin CY, Jin GM, Jin KY, Lee JY, Park T, Kim K, Sim X, Twee-Hee OR, Croteau-Chonka DC, Lange LA, Smith JD, Song K, Hua ZJ, Yuan X, Luan J, Lamina C, Ziegler A, Zhang W, Zee RY, Wright AF, Witteman JC, Wilson JF, Willensson G, Wichmann HE, Whitfield JB, Waterworth DM, Wareham NJ, Waeber G, Vollenweider P, Voight BF, Vitart V, Uitterlinden AG, Uda M, Tuomilehto J, Thompson JR, Tanaka T, Surakka I, Stringham HM, Spector TD, Soranzo N, Smit JH, Sinisalo J, Silander K, Sijbrands EJ, Scuteri A, Scott J, Schlessinger D, Sanna S, Salomaa V, Saharinen J, Sabatti C, Ruokonen A, Rudan I, Rose LM, Roberts R, Rieder M, Psaty BM, Pramstaller PP, Pichler I, Perola M, Penninx BW, Pedersen NL, Pattaro C, Parker AN, Pare G, Oostra BA, O'Donnell CJ, Nieminen MS, Nickerson DA, Montgomery GW, Meitinger T, McPherson R, McCarthy MI, McArdle W, Masson D, Martin NG, Marroni F, Mangino M, Magnusson PK, Lucas G, Luben R, Loos RJ, Lokki ML, Lettre G, Langenberg C, Launer LJ, Lakatta EG, Laaksonen R, Kyvik KO, Kronenberg F, Konig IR, Khaw KT, Kaprio J, Kaplan LM, Johansson A, Jarvelin MR, Janssens AC, Ingelsson E, Igl W, Kees HG, Hottenga JJ, Hofman A, Hicks AA, Hengstenberg C, Heid IM, Hayward C, Havulinna AS, Hastie ND, Harris TB, Haritunians T, Hall AS, Gyllenstein U, Guiducci C, Groop LC, Gonzalez E, Gieger C, Freimer NB, Ferrucci L, Erdmann J, Elliott P, Ejebe KG, Doring A, Dominiczak AF, Demissie S, Deloukas P, de Geus EJ, de FU, Crawford G, Collins FS, Chen YD, Caulfield MJ, Campbell H, Burt NP, Bonnycastle LL, Boomsma DI, Boekholdt SM, Bergman RN, Barroso I, Bandinelli S, Ballantyne CM, Assimes TL, Quertermous T, Altshuler D, Seielstad M, Wong TY, Tai ES, Feranil AB, Kuzawa CW, Adair LS, Taylor HA Jr, Borecki IB, Gabriel SB, Wilson JG, Holm H, Thorsteinsdottir U, Gudnason V, Krauss RM, Mohlke KL, Ordovas JM, Munroe PB, Kooner JS, Tall AR, Hegele RA, Kastelein JJ, Schadt EE, Rotter JJ, Boerwinkle E, Strachan DP, Mooser V, Stefansson K, Reilly MP, Samani NJ, Schunkert H, Cupples LA, Sandhu MS, Rader PM, Rader DJ, van Duijn CM, Peltonen L, Abecasis GR, Boehnke M, Kathiresan S. Biological, clinical and population relevance of 95 loci for blood lipids. *Nature* 2010;**466**:707–713.
41. Willer CJ, Sanna S, Jackson AU, Scuteri A, Bonnycastle LL, Clarke R, Heath SC, Timpson NJ, Najjar SS, Stringham HM, Strait J, Duren WL, Maschio A, Busonero F, Mulas A, Albai G, Swift AJ, Morken MA, Narisu N, Bennett D, Parish S, Shen H, Galan P, Meneton P, Hercberg S, Zelenika D, Chen WM, Li Y, Scott LJ, Scheet PA, Sundvall J, Watanabe RM, Nagaraja R, Ebrahim S, Lawlor DA, Ben-Shlomo Y, Davey-Smith G, Shuldiner AR, Collins R, Bergman RN, Uda M, Tuomilehto J, Cao A, Collins FS, Lakatta E, Lathrop GM, Boehnke M, Schlessinger D, Mohlke KL, Abecasis GR. Newly identified loci that influence lipid concentrations and risk of coronary artery disease. *Nat Genet* 2008;**40**:161–169.
42. Frikke-Schmidt R, Nordestgaard BG, Schnohr P, Steffensen R, Tybjaerg-Hansen A. Mutation in ABCA1 predicted risk of ischemic heart disease in the Copenhagen City Heart Study Population. *J Am Coll Cardiol* 2005;**46**:1516–1520.
43. Brunham LR, Singaraja RR, Hayden MR. Variations on a gene: rare and common variants in ABCA1 and their impact on HDL cholesterol levels and atherosclerosis. *Annu Rev Nutr* 2006;**26**:105–129.
44. Brunham LR, Kastelein JJ, Hayden MR. ABCA1 gene mutations, HDL cholesterol levels, and risk of ischemic heart disease. *JAMA* 2008;**300**:1997–1998.
45. Sivapalaratnam S, Boekholdt SM, Trip MD, Sandhu MS, Luben R, Kastelein JJ, Wareham NJ, Khaw KT. Family history of premature coronary heart disease and risk prediction in the EPIC-Norfolk prospective population study. *Heart* 2010;**96**:1985–1989.
